# Supplementary material for: Arsenic Exposure Perturbs the Gut Microbiome and Its Metabolic Profile in Mice: An Integrated Metagenomics and Metabolomics Analysis
Source: PubMed Central journal article supplement (PMC3948040; doi:10.1289/ehp.1307429), 2014-01-10
Supplement: ehp.1307429.s001.pdf [file ehp.1307429.s001.pdf]

**Supplemental Material**  
**Arsenic Exposure Perturbs the Gut Microbiome and Its Metabolic  
Profile in Mice: An Integrated Metagenomics and Metabolomics  
Analysis**

Kun Lu, Ryan Phillip Abo, Katherine Ann Schlieper, Michelle E. Graffam, Stuart Levine, John S. Wishnok,  
James A. Swenberg, Steven R. Tannenbaum, and James G. Fox

**Table of Contents**

|                                  |       |
|----------------------------------|-------|
| Supplemental Material, Table S1  | p. 2  |
| Supplemental Material, Table S2  | p. 3  |
| Supplemental Material, Table S3  | p. 4  |
| Supplemental Material, Table S4  | p. 6  |
| Supplemental Material, Figure S1 | p. 7  |
| Supplemental Material, Figure S2 | p. 8  |
| Supplemental Material, Figure S3 | p. 9  |
| Supplemental Material, Figure S4 | p. 10 |
| Supplemental Material, Figure S5 | p. 11 |

**Supplemental Material, Table S1.** Relative abundance of typical gut bacterial families in the measurements for control and arsenic exposed mice.<sup>a</sup>

| Taxa                                                                                                 | Relative abundance (control) | Standard error <sup>b</sup> (control) | Relative abundance (arsenic) | Standard error (arsenic) |
|------------------------------------------------------------------------------------------------------|------------------------------|---------------------------------------|------------------------------|--------------------------|
| Root;k Bacteria;Other;Other;Other;Other                                                              | 3.67E-02                     | 3.66E-03                              | 3.37E-02                     | 4.37E-03                 |
| Root;k Bacteria;p Actinobacteria;c Actinobacteria;o Bifidobacteriales;f Bifidobacteriaceae           | 8.39E-04                     | 4.09E-04                              | 2.11E-03                     | 8.85E-04                 |
| Root;k Bacteria;p Actinobacteria;c Actinobacteria;o Coriobacteriales;f                               | 0.00E+00                     | 0.00E+00                              | 8.29E-06                     | 4.76E-06                 |
| Root;k Bacteria;p Actinobacteria;c Actinobacteria;o Coriobacteriales;f Coriobacteriaceae             | 1.03E-03                     | 3.45E-04                              | 1.40E-03                     | 5.26E-04                 |
| Root;k Bacteria;p Bacteroidetes;c Bacteroidia;o Bacteroidales;f                                      | 4.16E-01                     | 3.65E-02                              | 4.46E-01                     | 6.85E-02                 |
| Root;k Bacteria;p Bacteroidetes;c Bacteroidia;o Bacteroidales;Other                                  | 3.18E-05                     | 1.36E-05                              | 6.60E-05                     | 1.64E-05                 |
| Root;k Bacteria;p Bacteroidetes;Other;Other;Other                                                    | 1.52E-05                     | 8.09E-06                              | 1.87E-06                     | 1.87E-06                 |
| Root;k Bacteria;p Cyanobacteria;c Chloroplast;o Streptophyta;f                                       | 2.40E-04                     | 9.37E-05                              | 4.49E-05                     | 1.66E-05                 |
| Root;k Bacteria;p Firmicutes;c Bacilli;o Bacillales;f Bacillaceae                                    | 0.00E+00                     | 0.00E+00                              | 5.96E-06                     | 4.31E-06                 |
| Root;k Bacteria;p Firmicutes;c Bacilli;o Bacillales;f Staphylococcaceae                              | 3.05E-06                     | 3.05E-06                              | 0.00E+00                     | 0.0E+00                  |
| Root;k Bacteria;p Firmicutes;c Bacilli;o Bacillales;Other                                            | 1.96E-05                     | 8.12E-06                              | 1.80E-04                     | 7.05E-05                 |
| Root;k Bacteria;p Firmicutes;c Bacilli;o Lactobacillales;f Enterococcaceae                           | 3.92E-06                     | 3.92E-06                              | 1.35E-05                     | 6.95E-06                 |
| Root;k Bacteria;p Firmicutes;c Bacilli;o Lactobacillales;f Lactobacillaceae                          | 5.67E-02                     | 2.31E-02                              | 3.14E-02                     | 8.48E-03                 |
| Root;k Bacteria;p Firmicutes;c Bacilli;o Lactobacillales;Other                                       | 1.23E-05                     | 6.49E-06                              | 0.00E+00                     | 0.0E+00                  |
| Root;k Bacteria;p Firmicutes;c Bacilli;o Turicibacterales;f Turicibacteraceae                        | 3.48E-02                     | 9.00E-03                              | 3.14E-02                     | 7.60E-03                 |
| Root;k Bacteria;p Firmicutes;c Bacilli;Other;Other                                                   | 1.48E-04                     | 5.62E-05                              | 9.60E-05                     | 2.65E-05                 |
| Root;k Bacteria;p Firmicutes;c Clostridia;o Clostridiales;f                                          | 1.62E-02                     | 2.46E-03                              | 9.81E-03                     | 1.74E-03                 |
| Root;k Bacteria;p Firmicutes;c Clostridia;o Clostridiales;f Catabacteriaceae                         | 1.43E-02                     | 2.53E-03                              | 7.35E-03                     | 1.85E-03                 |
| Root;k Bacteria;p Firmicutes;c Clostridia;o Clostridiales;f Clostridiaceae                           | 2.40E-02                     | 7.19E-03                              | 7.99E-03                     | 2.21E-03                 |
| Root;k Bacteria;p Firmicutes;c Clostridia;o Clostridiales;f Clostridiales Family XIII Incertae Sedis | 2.26E-04                     | 5.91E-05                              | 6.59E-04                     | 8.44E-05                 |
| Root;k Bacteria;p Firmicutes;c Clostridia;o Clostridiales;f Dehalobacteriaceae                       | 7.04E-04                     | 7.40E-05                              | 8.82E-04                     | 1.25E-04                 |
| Root;k Bacteria;p Firmicutes;c Clostridia;o Clostridiales;f Lachnospiraceae                          | 2.97E-01                     | 2.88E-02                              | 3.28E-01                     | 5.40E-02                 |
| Root;k Bacteria;p Firmicutes;c Clostridia;o Clostridiales;f Ruminococcaceae                          | 5.71E-02                     | 4.00E-03                              | 6.77E-02                     | 9.20E-03                 |
| Root;k Bacteria;p Firmicutes;c Clostridia;o Clostridiales;Other                                      | 1.00E-02                     | 1.68E-03                              | 1.09E-02                     | 2.89E-03                 |
| Root;k Bacteria;p Firmicutes;c Clostridia;Other;Other                                                | 1.44E-04                     | 5.67E-05                              | 1.28E-05                     | 8.89E-06                 |
| Root;k Bacteria;p Firmicutes;Other;Other;Other                                                       | 9.27E-05                     | 3.21E-05                              | 5.33E-05                     | 2.86E-05                 |
| Root;k Bacteria;p Proteobacteria;c Gammaproteobacteria;o Oceanospirillales;f Halomonadaceae          | 7.44E-06                     | 4.97E-06                              | 1.02E-05                     | 6.09E-06                 |
| Root;k Bacteria;p Proteobacteria;c Gammaproteobacteria;o Pseudomonadales;f Moraxellaceae             | 1.48E-05                     | 1.18E-05                              | 1.20E-05                     | 5.95E-06                 |
| Root;k Bacteria;p Tenericutes;c Erysipelotrichi;o Erysipelotrichales;f Erysipelotrichaceae           | 6.86E-03                     | 2.80E-03                              | 6.54E-04                     | 1.42E-04                 |
| Root;k Bacteria;p Tenericutes;c Mollicutes;o Anaeroplasmatales;f Anaeroplasmataceae                  | 2.08E-02                     | 6.16E-03                              | 1.62E-02                     | 3.42E-03                 |
| Root;k Bacteria;p Tenericutes;c Mollicutes;o RF39;f                                                  | 2.39E-03                     | 3.80E-04                              | 1.88E-03                     | 5.76E-04                 |
| Root;k Bacteria;p Tenericutes;Other;Other;Other                                                      | 3.92E-06                     | 3.92E-06                              | 9.73E-07                     | 9.73E-07                 |
| Root;Other;Other;Other;Other;Other                                                                   | 4.33E-03                     | 9.14E-04                              | 1.83E-03                     | 2.76E-04                 |

<sup>a</sup>The "Other" assignments are typically due to ambiguity when the RDP classifier tries to assign at the desired level. The "f\_" or "f\_unassigned" means that it matches a reference sequence, but that reference sequence is not well defined. <sup>b</sup>The mean and standard errors were calculated using the statistical tool of Metastats.

**Supplemental Material, Table S2.** Identified significantly changed metabolites (fold change >1.5  $p < 0.05$  compared to controls) by MS/MS in fecal samples.

| Name                                                    | HMDB ID <sup>a</sup> | Fold  | <i>p</i> value | Mass     | Retention time | Gut flora related | Pathways or functions       |
|---------------------------------------------------------|----------------------|-------|----------------|----------|----------------|-------------------|-----------------------------|
| O-Desmethylangolensin                                   | HMDB04629            | 10.3  | 0.001          | 259.0971 | 22             | Y                 | Isoflavone                  |
| Hydroxyphenylacetic acid                                | HMDB00440            | 3.6   | 0.05           | 153.054  | 15.1           | Y                 | Tyrosine metabolism         |
| 1b-Hydroxycholic acid or Tetrahydroxy-5b-cholanoic acid | HMDB00307            | 2.5   | 0.04           | 425.2936 | 23.7           | Y                 | Bile acids                  |
| MG(0:0/18:2(9Z,12Z)/0:0)                                | HMDB11538            | 2.4   | 0.03           | 355.2822 | 33.1           |                   | Lipids                      |
| Cinnamaldehyde                                          | HMDB03441            | 2.3   | 0.01           | 133.0647 | 23.8           |                   | Phenylpropanoid             |
| 7 alpha-Hydroxy-3-oxo-4-cholestenoate                   | HMDB12458            | 2.2   | 0.05           | 431.3119 | 29.6           | Y                 | Bile acids                  |
| 1b-Hydroxycholic acid                                   | HMDB00307            | 2.1   | 0.05           | 425.2906 | 24.8           | Y                 | Bile acids                  |
| Benzaldehyde                                            | HMDB06115            | 2.0   | 0.04           | 107.0488 | 15.1           | Y                 |                             |
| 5-Phenylvaleric acid                                    | HMDB02043            | 1.9   | 0.008          | 179.1058 | 19.9           | Y                 | Fatty acids                 |
| Dimethylbenzoic acid                                    | HMDB02237            | 1.8   | 0.05           | 151.074  | 15.3           |                   | Benzoic acid                |
| Propionylcholine                                        | HMDB13305            | 1.8   | 0.04           | 161.1416 | 2              | Y                 |                             |
| Alpha-Linolenic acid                                    | HMDB01388            | 1.7   | 0.04           | 279.2308 | 30.9           |                   | Fatty acids                 |
| 3-Oxo-4,6-choladienoic acid                             | HMDB00476            | 1.7   | 0.05           | 371.258  | 26.1           | Y                 | Bile acids                  |
| Kynurenic acid                                          | HMDB00715            | 1.7   | 0.03           | 190.0489 | 21.1           |                   | Tryptophan metabolism       |
| N-Acetylhistamine                                       | HMDB13253            | 1.5   | 0.02           | 154.0969 | 1.9            | Y                 | Amino acids and derivatives |
| 2-Aminooctanoic acid                                    | HMDB00991            | 1.5   | 0.04           | 160.1321 | 2.6            |                   |                             |
| Cytidine                                                | HMDB00089            | -1.6  | 0.02           | 244.0927 | 3.3            |                   | Nucleotide                  |
| N-a-Acetyl-L-arginine                                   | HMDB04620            | -1.8  | 0.005          | 217.1284 | 2              |                   | Amino acids and derivatives |
| Glycocholic acid                                        | HMDB00138            | -2.3  | 0.007          | 466.3143 | 25.8           | Y                 | Bile acids                  |
| Guanosine                                               | HMDB00133            | -2.3  | 0.05           | 284.0966 | 3.1            |                   | Nucleoside                  |
| N6-Methyllysine                                         | HMDB02038            | -2.4  | 0.03           | 161.1276 | 4.4            |                   | Amino acids and derivatives |
| Dihydrodaidzein                                         | HMDB05760            | -3.0  | 0.002          | 257.0809 | 22.8           | Y                 | Isoflavone                  |
| Cuminaldehyde                                           | HMDB02214            | -3.0  | 0.02           | 149.0947 | 18.3           | Y                 |                             |
| Indole-3-carbinol                                       | HMDB05785            | -3.1  | 0.04           | 148.074  | 20.2           | Y                 | Indoles                     |
| Daidzein                                                | HMDB03312            | -4.9  | 0.05           | 255.065  | 22.4           | Y                 | Isoflavone                  |
| Phenylpyruvic acid                                      | HMDB00205            | -6.7  | <0.0001        | 165.0539 | 14.9           | Y                 | Phenylalanine metabolism    |
| Indolelactic acid                                       | HMDB00671            | -11.6 | 0.0001         | 206.081  | 19.6           | Y                 | Indoles                     |

<sup>a</sup>The metabolites were indexed using the IDs in the Human Metabolome Database (HMDB, <http://www.hmdb.ca/>).

**Supplemental Material, Table S3.** Identified significantly changed metabolites (fold change >1.5  $p < 0.05$ , compared to controls) in urine samples.

| Name                                      | HMDB ID <sup>a</sup> | Fold | <i>p</i> value | Mass      | Retention time | Gut flora related | Pathways or functions        |
|-------------------------------------------|----------------------|------|----------------|-----------|----------------|-------------------|------------------------------|
| Dihydrogenistein                          | HMDB05897            | 3.8  | 0.04           | 273.07639 | 23.3           | Y                 | Isoflavone                   |
| LysoPC(P-18:0)                            | HMDB13122            | 3.6  | 0.04           | 508.37841 | 30.2           |                   | Lipid                        |
| Indoxyl                                   | HMDB04094            | 2.9  | 0.01           | 134.05988 | 16.0           | Y                 | Tryptophan                   |
| 4-Hydroxyphenylacetylglutamine            | HMDB06061            | 2.4  | 0.009          | 282.09739 | 11.4           | Y                 | Amino acids and derivatives  |
| Stearic acid                              | HMDB00827            | 2.2  | 0.02           | 285.27934 | 35.8           |                   | Fatty Acids                  |
| Cytosine                                  | HMDB00630            | 2.1  | 0.009          | 112.05043 | 12.8           |                   | Pyrimidine                   |
| L-Methionine                              | HMDB00696            | 1.9  | 0.01           | 150.05808 | 2.7            |                   | Amino acids                  |
| Hydroxyisobutyric acid                    | HMDB00336            | 1.8  | 0.01           | 105.05504 | 2.7            |                   | Organic acid                 |
| 3-Indolepropionic acid                    | HMDB02302            | 1.8  | 0.05           | 190.08627 | 19.5           | Y                 | Indoles                      |
| Tyramine                                  | HMDB00306            | 1.8  | 0.04           | 138.09133 | 4.3            | Y                 | Biogenic amine               |
| N6-Acetyl-L-lysine                        | HMDB00206            | 1.7  | 0.02           | 189.12315 | 15.0           |                   | Amino acids and derivatives  |
| Indole-3-carboxylic acid                  | HMDB03320            | 1.7  | 0.02           | 162.05471 | 15.1           | Y                 | Indoles                      |
| Hippuric acid                             | HMDB00714            | 1.7  | 0.04           | 180.06588 | 15.1           | Y                 | Amino acids and Derivatives  |
| 2-Phenylglycine                           | HMDB02210            | 1.6  | 0.05           | 152.07037 | 15.1           |                   | Amino acids and derivatives  |
| Cuminaldehyde                             | HMDB02214            | 1.6  | 0.04           | 149.09581 | 16.7           |                   |                              |
| Propionylcarnitine                        | HMDB00824            | 1.6  | 0.009          | 218.13825 | 3.5            |                   | Acyl carnitines              |
| Indoleacrylic acid                        | HMDB00734            | 1.5  | 0.03           | 188.07051 | 20.4           | Y                 | Indoles                      |
| Salicylic acid                            | HMDB01895            | 1.5  | 0.01           | 139.03878 | 12.8           |                   | Benzoic acid and derivatives |
| N-Acetylvanilalanine                      | HMDB11716            | 1.5  | 0.01           | 254.10265 | 14.9           |                   | Amino acids and derivatives  |
| 4-(2-Aminophenyl)-2,4-dioxobutanoic acid  | HMDB00978            | 1.5  | 0.0005         | 208.06045 | 14.8           |                   | Tryptophan metabolism        |
| Salicyluric acid                          | HMDB00840            | -1.5 | 0.004          | 196.06063 | 11.1           |                   | Amino acids and derivatives  |
| N-Nonanoylglycine                         | HMDB13279            | -1.5 | 0.0009         | 216.15943 | 25.7           |                   | Amino acids and derivatives  |
| Octanoylcarnitine                         | HMDB00791            | -1.5 | 0.04           | 288.2174  | 21.7           |                   | Acyl carnitines              |
| Dodecanedioic acid                        | HMDB00623            | -1.5 | 0.01           | 231.15882 | 21.6           |                   | Fatty acids                  |
| Dodecenoylcarnitine                       | HMDB13326            | -1.5 | 0.007          | 342.26408 | 25.5           |                   | Acyl carnitines              |
| 9-Decenoylcarnitine                       | HMDB13205            | -1.5 | 0.0005         | 314.23313 | 22.9           |                   | Acyl carnitines              |
| Acetylcysteine                            | HMDB01890            | -1.5 | 0.005          | 164.03729 | 25.1           |                   | Amino acids and derivatives  |
| Hydroxyphenylacetic acid                  | HMDB00440            | -1.5 | 0.03           | 153.05475 | 19.5           | Y                 | Phenylalanine metabolism     |
| 2-Hexenoylcarnitine                       | HMDB13161            | -1.6 | 0.005          | 258.16807 | 18.2           |                   | Acyl carnitines              |
| Decanoylcarnitine                         | HMDB00651            | -1.6 | 0.04           | 316.24841 | 24.2           |                   | Acyl carnitines              |
| 2,8-Dihydroxyquinoline-beta-D-glucuronide | HMDB11658            | -1.6 | 0.02           | 338.08789 | 10.5           | Y                 | Glucuronides                 |

| Name                                  | HMDB ID <sup>a</sup> | Fold | <i>p</i> value | Mass      | Retention time | Gut flora related | Pathways or functions    |
|---------------------------------------|----------------------|------|----------------|-----------|----------------|-------------------|--------------------------|
| 3-Indole carboxylic acid glucuronide  | HMDB13189            | -1.7 | 0.002          | 338.08819 | 4.3            | Y                 | Glucuronides             |
| Pyrrolidonecarboxylic acid            | HMDB00805            | -1.8 | 0.0006         | 130.04981 | 25.1           |                   | Glutamine metabolism     |
| 3-Dehydroxycarnitine                  | HMDB06831            | -1.8 | 0.003          | 146.11625 | 2.6            |                   | Acyl carnitines          |
| Benzaldehyde                          | HMDB06115            | -1.9 | 0.03           | 107.04916 | 17.6           | Y                 |                          |
| 3-Methyldioxyindole                   | HMDB04186            | -2.1 | 0.0006         | 164.07013 | 16.3           | Y                 | Tryptophan metabolism    |
| Phenylacetaldehyde                    | HMDB06236            | -2.1 | 0.03           | 121.06421 | 13.4           | Y                 | Phenylalanine metabolism |
| Coumarin                              | HMDB01218            | -2.9 | 0.03           | 147.0439  | 15.8           |                   |                          |
| 6-Hydroxy-5-methoxyindole glucuronide | HMDB10362            | -3.0 | 0.002          | 340.10401 | 5.0            | Y                 | Glucuronides             |
| 5-Methyltetrahydrofolic acid          | HMDB01396            | -9.9 | 0.03           | 460.19541 | 9.0            |                   |                          |

<sup>a</sup>The metabolites were indexed using the IDs in the Human Metabolome Database (HMDB, <http://www.hmdb.ca/>).

**Supplemental Material, Table S4.** Identified significantly changed metabolites (fold change >1.5  $p < 0.05$ , compared to controls) in plasma samples.

| Name                       | HMDB ID <sup>a</sup> | Fold  | p value | Mass     | Retention Time (RT) | Gut flora related | Pathways                    |
|----------------------------|----------------------|-------|---------|----------|---------------------|-------------------|-----------------------------|
| Phenylacetyl glycine       | HMDB00821            | 2.22  | 0.03    | 194.0805 | 16.9                | Y                 | Amino acids and derivatives |
| LysoPC(20:4)               | HMDB10395            | 1.53  | 0.02    | 544.3362 | 29.1                |                   | Lipids                      |
| Cytosine                   | HMDB00630            | 1.52  | 0.03    | 112.051  | 2.3                 |                   | Pyrimidine metabolism       |
| LysoPC(22:6)               | HMDB10404            | 1.5   | 0.03    | 568.3351 | 28.1                |                   | Lipids                      |
| LysoPC(15:0)               | HMDB10381            | -1.5  | 0.009   | 482.3198 | 28.1                |                   | Lipids                      |
| Phenylpyruvic acid         | HMDB00205            | -1.5  | 0.05    | 165.0538 | 8.8                 | Y                 | Phenylalanine metabolism    |
| Heptadecanoyl carnitine    | HMDB06210            | -1.62 | 0.04    | 414.354  | 27.2                |                   | Acyl carnitines             |
| 3-Methylglutaryl carnitine | HMDB00552            | -1.64 | 0.02    | 290.1601 | 5.8                 |                   | Acyl carnitines             |
| 3-Dehydroxycarnitine       | HMDB06831            | -1.75 | 0.03    | 146.117  | 2                   |                   | Acyl carnitines             |
| Lipoic acid                | HMDB01451            | -2.48 | 0.006   | 207.0512 | 1.7                 |                   | Lipoic acid metabolism      |

<sup>a</sup>The metabolites were indexed using the IDs in the Human Metabolome Database (HMDB, <http://www.hmdb.ca/> ).

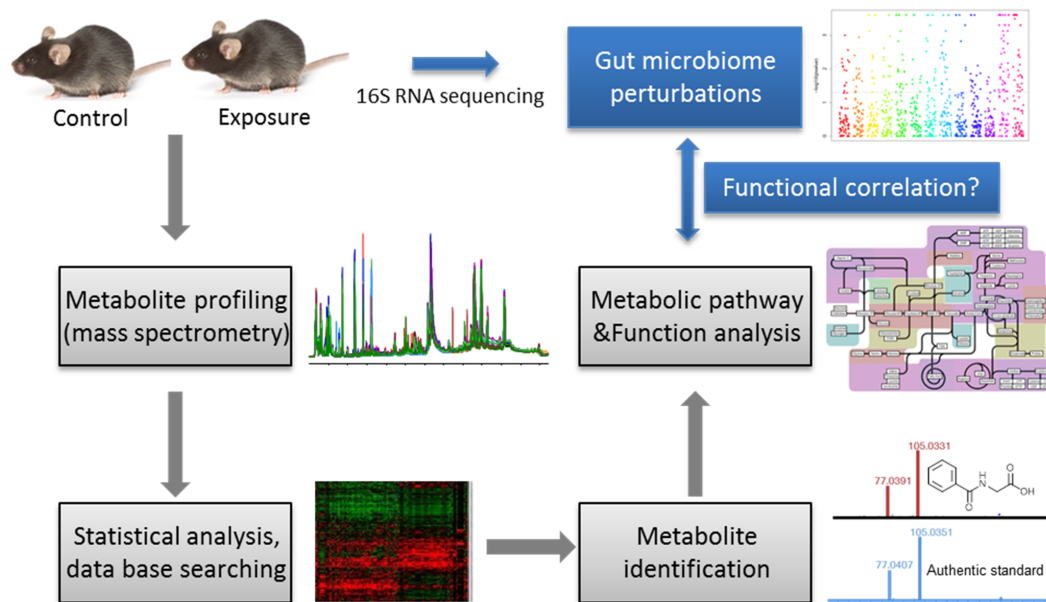

**Supplemental Material, Figure S1.** The integration approach combining 16S rRNA gene sequencing and mass spectrometry-based metabolomics profiling to explore the impact of arsenic exposure on the gut microbiome and its metabolomic profile.

A.

- Root;Other;Other;Other;Other;Other
- Root;k\_Bacteria;Other;Other;Other;Other
- Root;k\_Bacteria;p\_Actinobacteria;c\_Actinobacteria;o\_Bifidobacteriales;f\_Bifidobacteriaceae
- Root;k\_Bacteria;p\_Actinobacteria;c\_Actinobacteria;o\_Coriobacteriales;Other
- Root;k\_Bacteria;p\_Actinobacteria;c\_Actinobacteria;o\_Coriobacteriales;f\_Coriobacteriaceae
- Root;k\_Bacteria;p\_Bacteroidetes;Other;Other;Other
- Root;k\_Bacteria;p\_Bacteroidetes;c\_Bacteroidia;o\_Bacteroidales;Other
- Root;k\_Bacteria;p\_Bacteroidetes;c\_Bacteroidia;o\_Bacteroidales;f\_
- Root;k\_Bacteria;p\_Bacteroidetes;c\_Bacteroidia;o\_Bacteroidales;f\_Porphyrimonadaaceae
- Root;k\_Bacteria;p\_Bacteroidetes;c\_Flavobacteria;Other;Other
- Root;k\_Bacteria;p\_Cyanobacteria;c\_Chloroplast;o\_Streptophyta;f\_
- Root;k\_Bacteria;p\_Firmicutes;Other;Other;Other
- Root;k\_Bacteria;p\_Firmicutes;c\_Bacilli;Other;Other
- Root;k\_Bacteria;p\_Firmicutes;c\_Bacilli;o\_Bacillales;Other
- Root;k\_Bacteria;p\_Firmicutes;c\_Bacilli;o\_Bacillales;f\_Staphylococcaceae
- Root;k\_Bacteria;p\_Firmicutes;c\_Bacilli;o\_Lactobacillales;Other
- Root;k\_Bacteria;p\_Firmicutes;c\_Bacilli;o\_Lactobacillales;f\_Enterococcaceae
- Root;k\_Bacteria;p\_Firmicutes;c\_Bacilli;o\_Lactobacillales;f\_Lactobacillaceae
- Root;k\_Bacteria;p\_Firmicutes;c\_Bacilli;o\_Turicibacterales;f\_Turicibacteraceae
- Root;k\_Bacteria;p\_Firmicutes;c\_Clostridia;Other;Other
- Root;k\_Bacteria;p\_Firmicutes;c\_Clostridia;o\_Clostridiales;Other
- Root;k\_Bacteria;p\_Firmicutes;c\_Clostridia;o\_Clostridiales;f\_
- Root;k\_Bacteria;p\_Firmicutes;c\_Clostridia;o\_Clostridiales;f\_Catabacteriaceae
- Root;k\_Bacteria;p\_Firmicutes;c\_Clostridia;o\_Clostridiales;f\_Clostridiaceae
- Root;k\_Bacteria;p\_Firmicutes;c\_Clostridia;o\_Clostridiales;f\_Clostridiales Family XIII. Incertae Sedis
- Root;k\_Bacteria;p\_Firmicutes;c\_Clostridia;o\_Clostridiales;f\_Dehalobacteriaceae
- Root;k\_Bacteria;p\_Firmicutes;c\_Clostridia;o\_Clostridiales;f\_Lachnospiraceae
- Root;k\_Bacteria;p\_Firmicutes;c\_Clostridia;o\_Clostridiales;f\_Ruminococcaceae
- Root;k\_Bacteria;p\_Proteobacteria;c\_Alphaproteobacteria;o\_Rhodobacteriales;f\_Rhodobacteraceae
- Root;k\_Bacteria;p\_Proteobacteria;c\_Gammaproteobacteria;o\_Alteromonadales;Other
- Root;k\_Bacteria;p\_Proteobacteria;c\_Gammaproteobacteria;o\_Oceanospirillales;f\_Halomonadaceae
- Root;k\_Bacteria;p\_Proteobacteria;c\_Gammaproteobacteria;o\_Pseudomonadales;f\_Moraxellaceae
- Root;k\_Bacteria;p\_Tenericutes;c\_Erysipelotrichi;o\_Erysipelotrichales;f\_Erysipelotrichaceae
- Root;k\_Bacteria;p\_Tenericutes;c\_Mollicutes;o\_Anaeroplasmatales;f\_Anaeroplasmataceae
- Root;k\_Bacteria;p\_Tenericutes;c\_Mollicutes;o\_RF39;f\_

B.

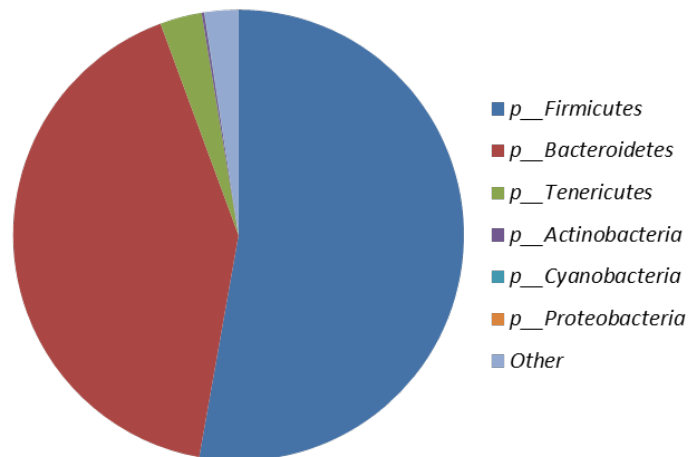

**Supplemental Material, Figure S2.** The taxonomic assignments of gut bacterial families, obtained using the Ribosomal Database Project classifier, with each color representing an individual bacterial family (A). Predominant gut bacteria at *phylum* level revealed by 16S rRNA sequencing, with *p\_Firmicutes* and *p\_Bacteroidetes* being the top 2 *phyla* (B).



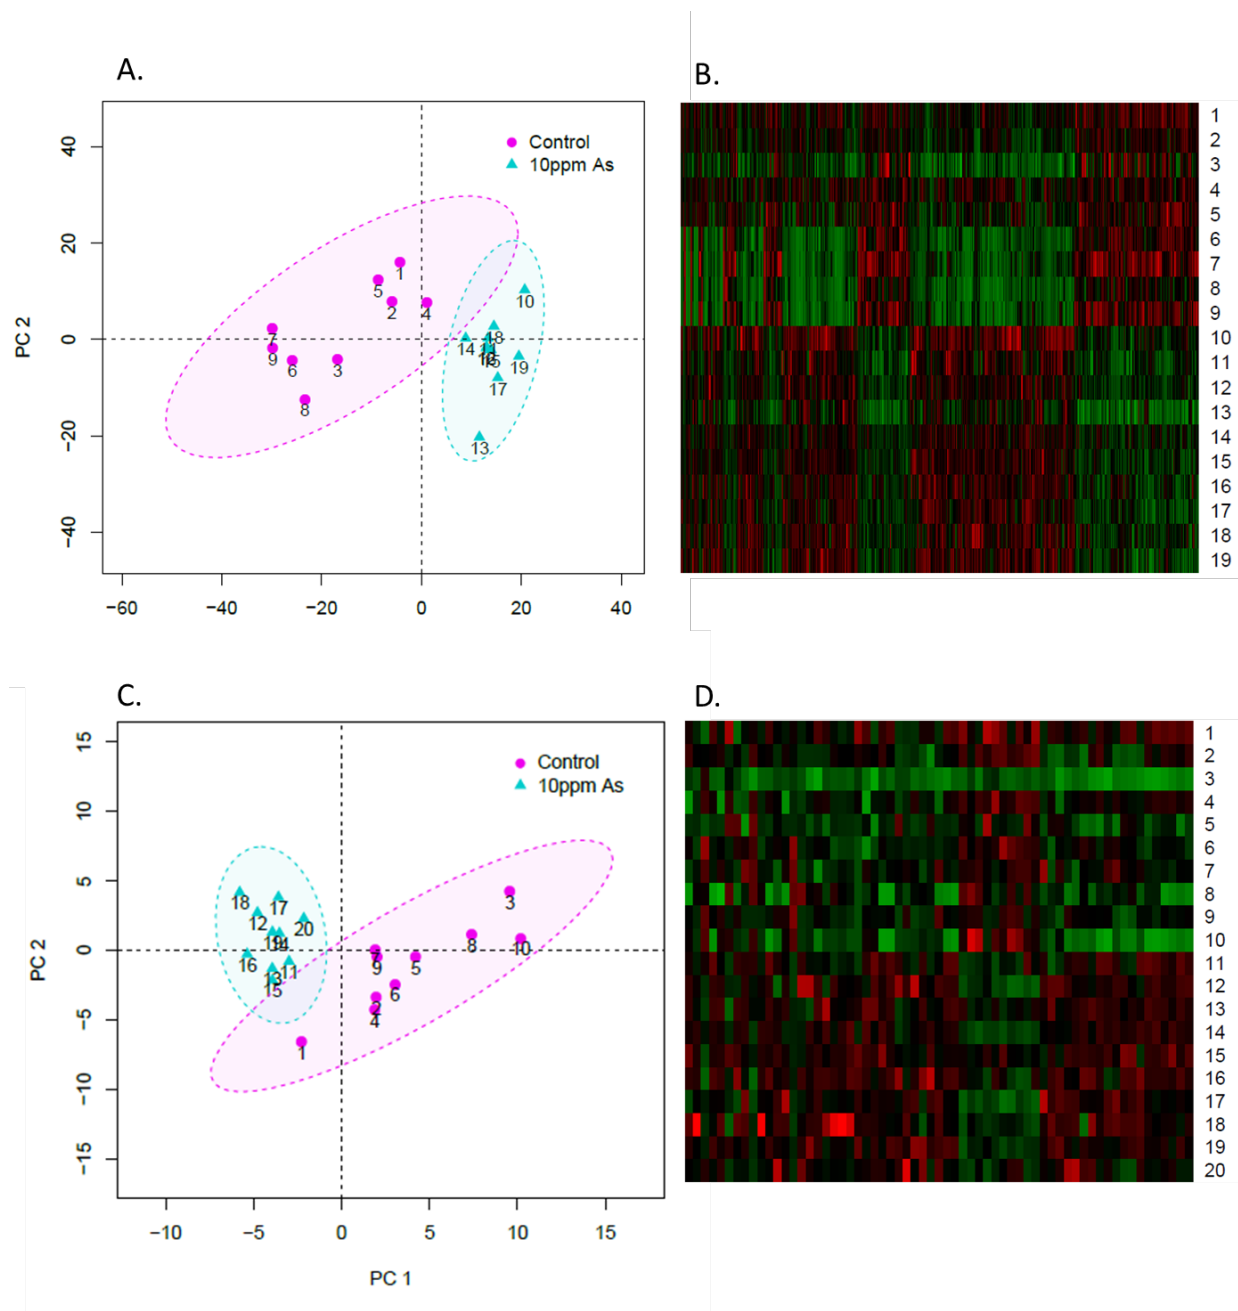

**Supplemental Material, Figure S3.** Separation of control and arsenic-treated mice using urine metabolite profiles by principal component analysis (A); The hierarchical clustering heat map constructed using urine molecular features with 1.5 fold changes ( $p < 0.05$ ) shows a consistent clustering pattern within individual groups (B); Separation of control and arsenic-treated mice using metabolite profiles of plasma by principal component analysis (C); The hierarchical clustering heat map constructed using plasma molecular features with 1.5 fold changes ( $p < 0.05$ ) (D).

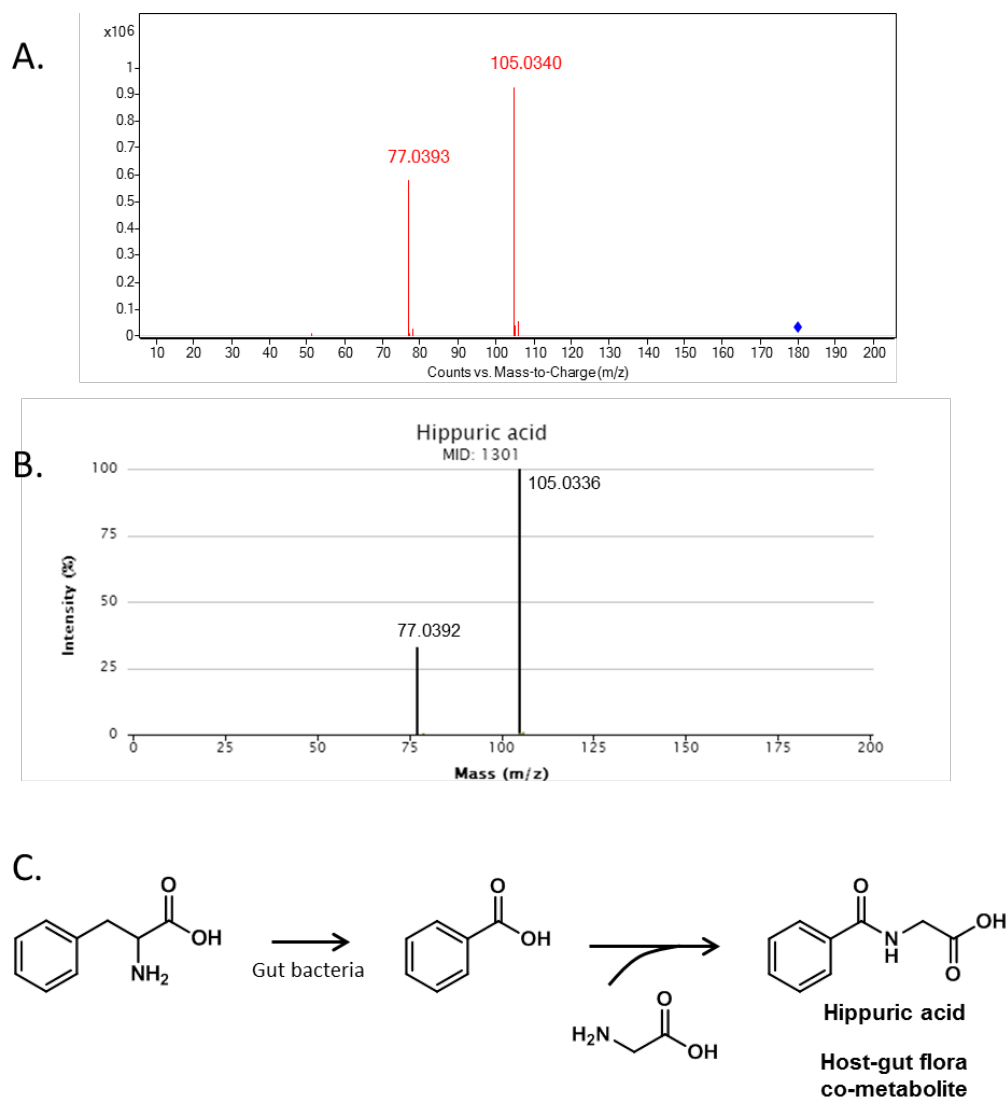

**Supplemental Material, Figure S4.** MS/MS spectrum of  $m/z = 180.0658$  at 15 min identifies this metabolite as hippuric acid (A: urine metabolite; B: the MS/MS spectrum of hippuric acid in the database); Hippuric acid is synthesized via phenylalanine metabolism and has been identified as a host-gut flora co-metabolite (C). (Database searching, using the exact mass at  $m/z$  180.0658, gave 5-10 hits depending on the database. The product-ion spectrum arising from  $m/z$  180.0658 at 15.1 min included characteristic hippuric acid fragments at  $m/z$  77.0393 and  $m/z$  105.0340, consistent with the fragmentation pattern in the database and for an authentic standard. Further metabolic pathway analysis illustrates that hippuric acid is a host-gut flora co-metabolite and its abundance is strongly associated with imbalanced gut microbiome composition).

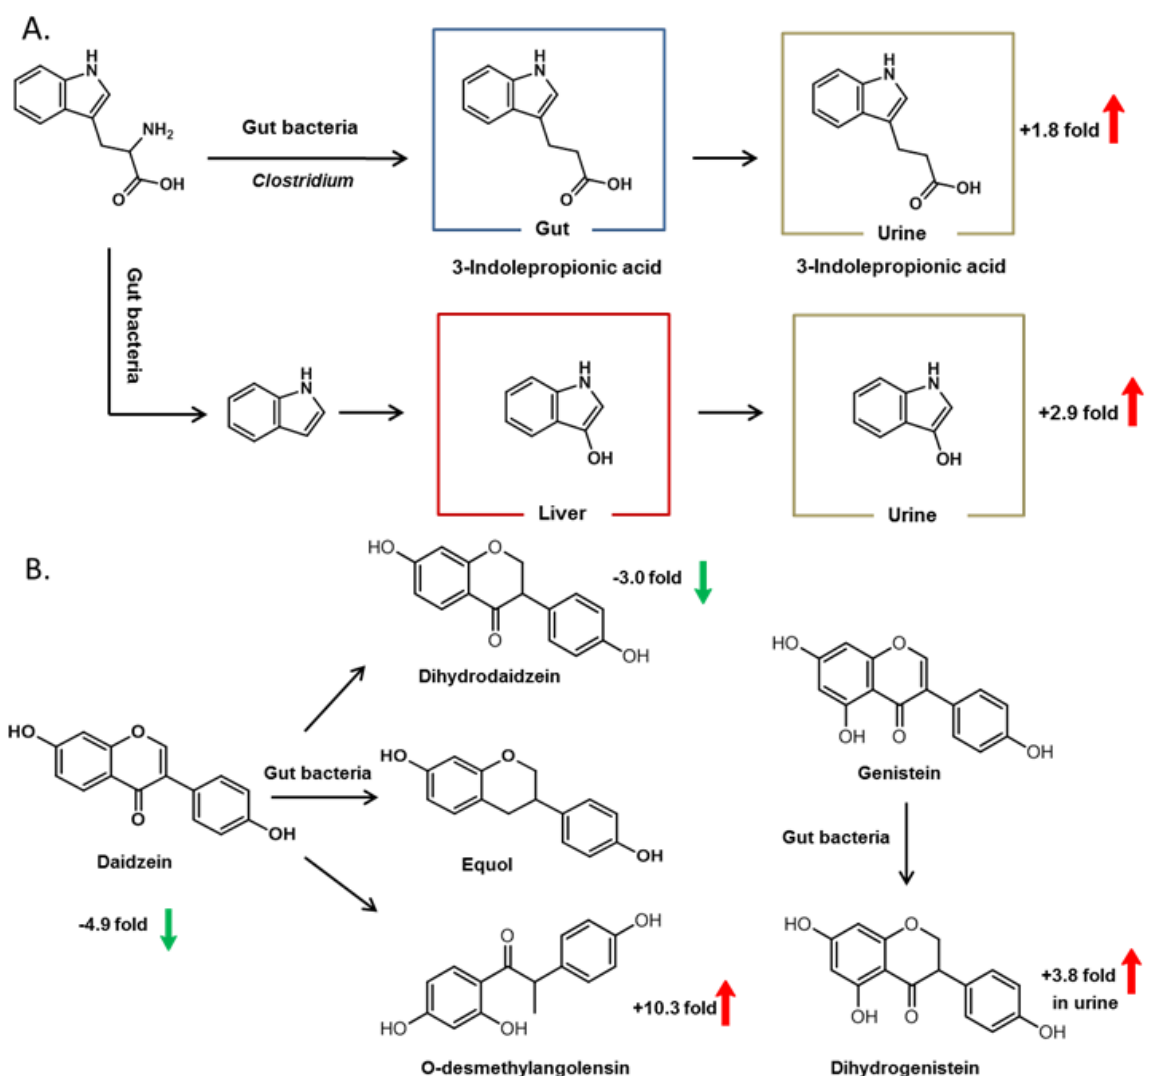

**Supplemental Material, Figure S5.** The influence of arsenic-induced gut microbiome perturbations on the formation of some typical gut-flora-generated fecal and urine metabolites. Indole derivatives were significantly regulated during exposure, with indolepropionic acid, indoxyl and others being increased in urine (A); Alterations of several isoflavone metabolites also clearly illustrate the effects of arsenic-induced gut flora changes, with daidzein and dihydrodaidzein being down-regulated, and O-desmethylangolensin and dihydrogenistein being up-regulated in feces and urine, respectively (B).
